# Supplementary material
Source: PubMed Central journal article supplement (PMC4256678)
Supplement: NIHMS637864-supplement-supplement_1.pdf [file NIHMS637864-supplement-supplement_1.pdf]

## **SUPPLEMENTARY INFORMATION**

### **Active, phosphorylated fingolimod inhibits histone deacetylases and facilitates fear extinction memory**

Nitai C. Hait, Laura E. Wise, Jeremy C. Allegood, Megan O'Brien, Dorit Avni,  
Thomas M. Reeves, Pamela E. Knapp, Junyan Lu, Cheng Luo, Michael F. Miles,  
Sheldon Milstien, Aron Lichtman, and Sarah Spiegel

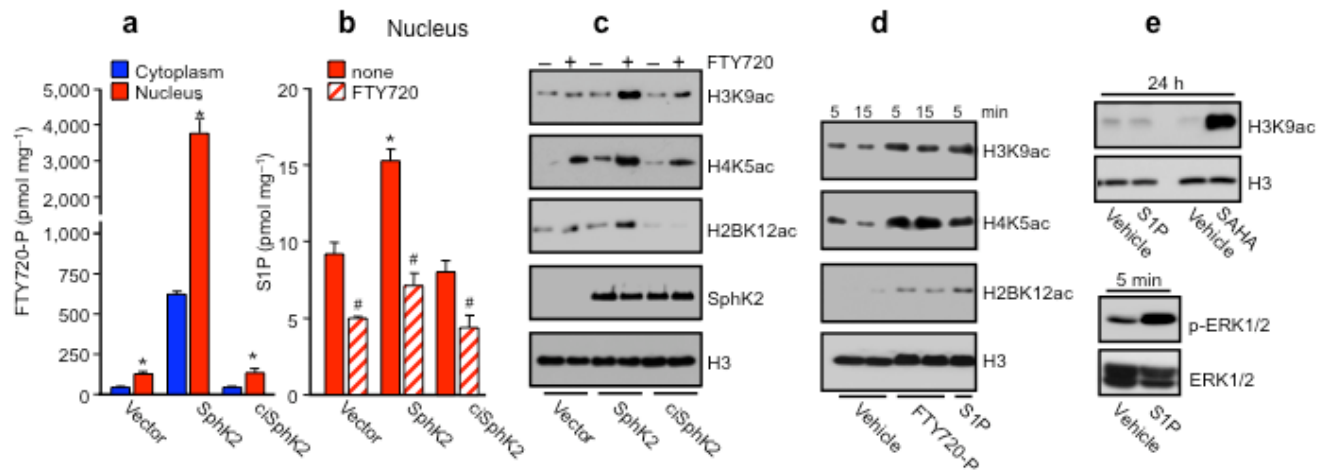

**Supplementary Figure 1. FTY720 is phosphorylated by nuclear SphK2 and enhances histone acetylations in HeLa cells.** (a-c) HeLa cells transfected with vector, SphK2, or catalytically inactive SphK2<sup>G212E</sup> (ciSphK2) were treated without or with FTY720 (5  $\mu$ M) for 6 h (N = 3 per group). Nuclear and cytoplasmic levels of FTY720-P (a) and S1P (b) were determined by LC-ESI-MS/MS. Data are means  $\pm$  s.d. \*P < 0.01 compared to vector. #P < 0.01 compared to untreated (unpaired two-tail t test). (c) Histone acetylations in nuclear extracts were detected by immunoblotting with the indicated antibodies. (d) Purified nuclei from HeLa cells were incubated for the indicated times with vehicle, S1P (1  $\mu$ M), or FTY720-P (1  $\mu$ M) and histone acetylations determined. (e) Naïve HeLa cells were treated with vehicle, S1P (100 nM), or SAHA (1  $\mu$ M) for the indicated times and proteins were analyzed by western blotting.

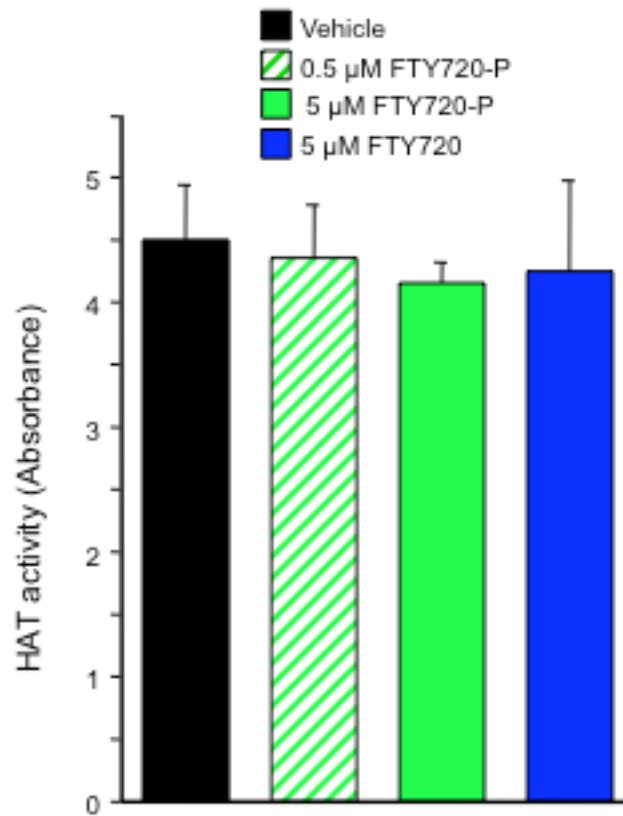

**Supplementary Figure 2. FTY720-P does not affect HAT activity.** HAT activity in nuclear extracts was determined with a colorimetric HAT activity assay in the presence of vehicle, FTY720-P (0.5 or 5  $\mu\text{M}$ ) or FTY720 (5  $\mu\text{M}$ ). HAT activities are averages of triplicate determinations  $\pm$  s.d. and expressed as OD at 440 nm per mg.

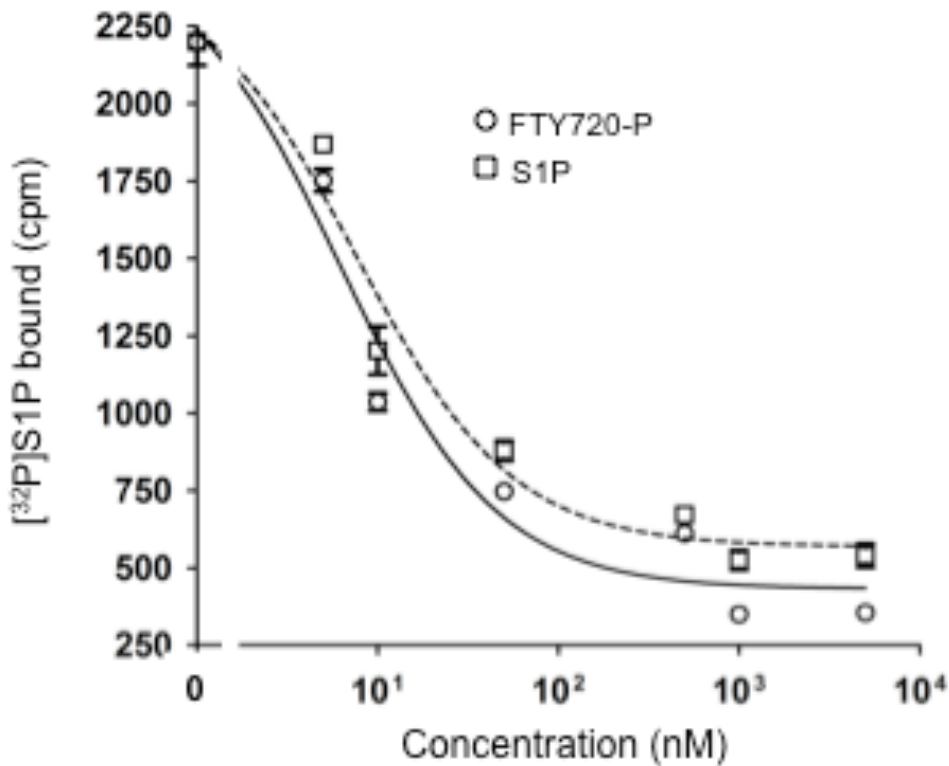

**Supplementary Figure 3. High-affinity binding of S1P and FTY720-P to HDAC1.** Recombinant His-tagged HDAC1 immobilized to Ni-NTA-resin was incubated with [<sup>32</sup>P]S1P (0.1 nM) in the absence or presence of increasing concentrations of unlabeled S1P or FTY720-P. Beads were washed extensively and [<sup>32</sup>P]S1P bound to HDAC1 was eluted with 500 mM imidazole and radioactivity detected by scintillation counting. Data were fit to a one-site Scatchard model using GraphPad Prism. S1P and FTY720-P bind to HDAC1 with apparent K<sub>d</sub> values of 7.5 and 6.2 nM, respectively. R<sup>2</sup> values for displacement by S1P and FTY720-P were 0.9581 and 0.9610, respectively.

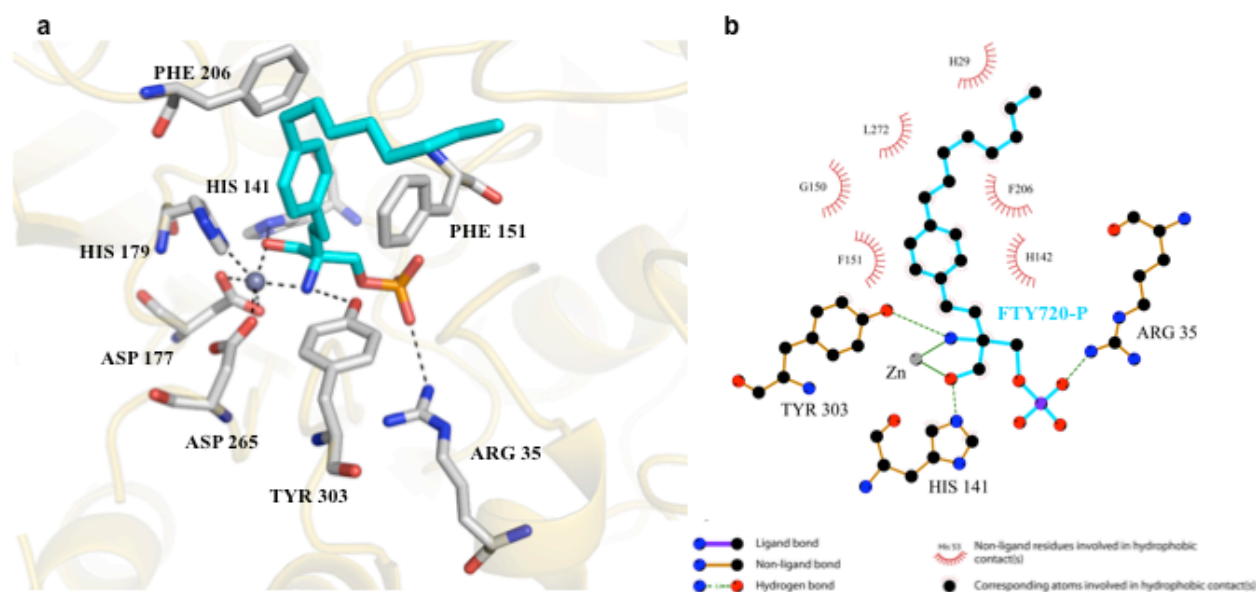

**Supplementary Figure 4. Docking of FTY720-P into the active site of HDAC2.**

**(a)** Binding mode between FTY720-P and the substrate-binding pocket of HDAC2. Active site residues that are involved in the interaction with small molecules are shown as sticks and the Zn atom is shown as a sphere. The polar contacts between active site residues, Zn, and small molecules are represented by black dashed lines. **(b)** Schematic representation of the interaction of FTY720-P with HDAC2 calculated by Ligplot. Thatched semi-circles indicate van der Waals contacts between hydrophobic amino acid residues and FTY720-P. Hydrogen bonds are shown as green dashed lines.

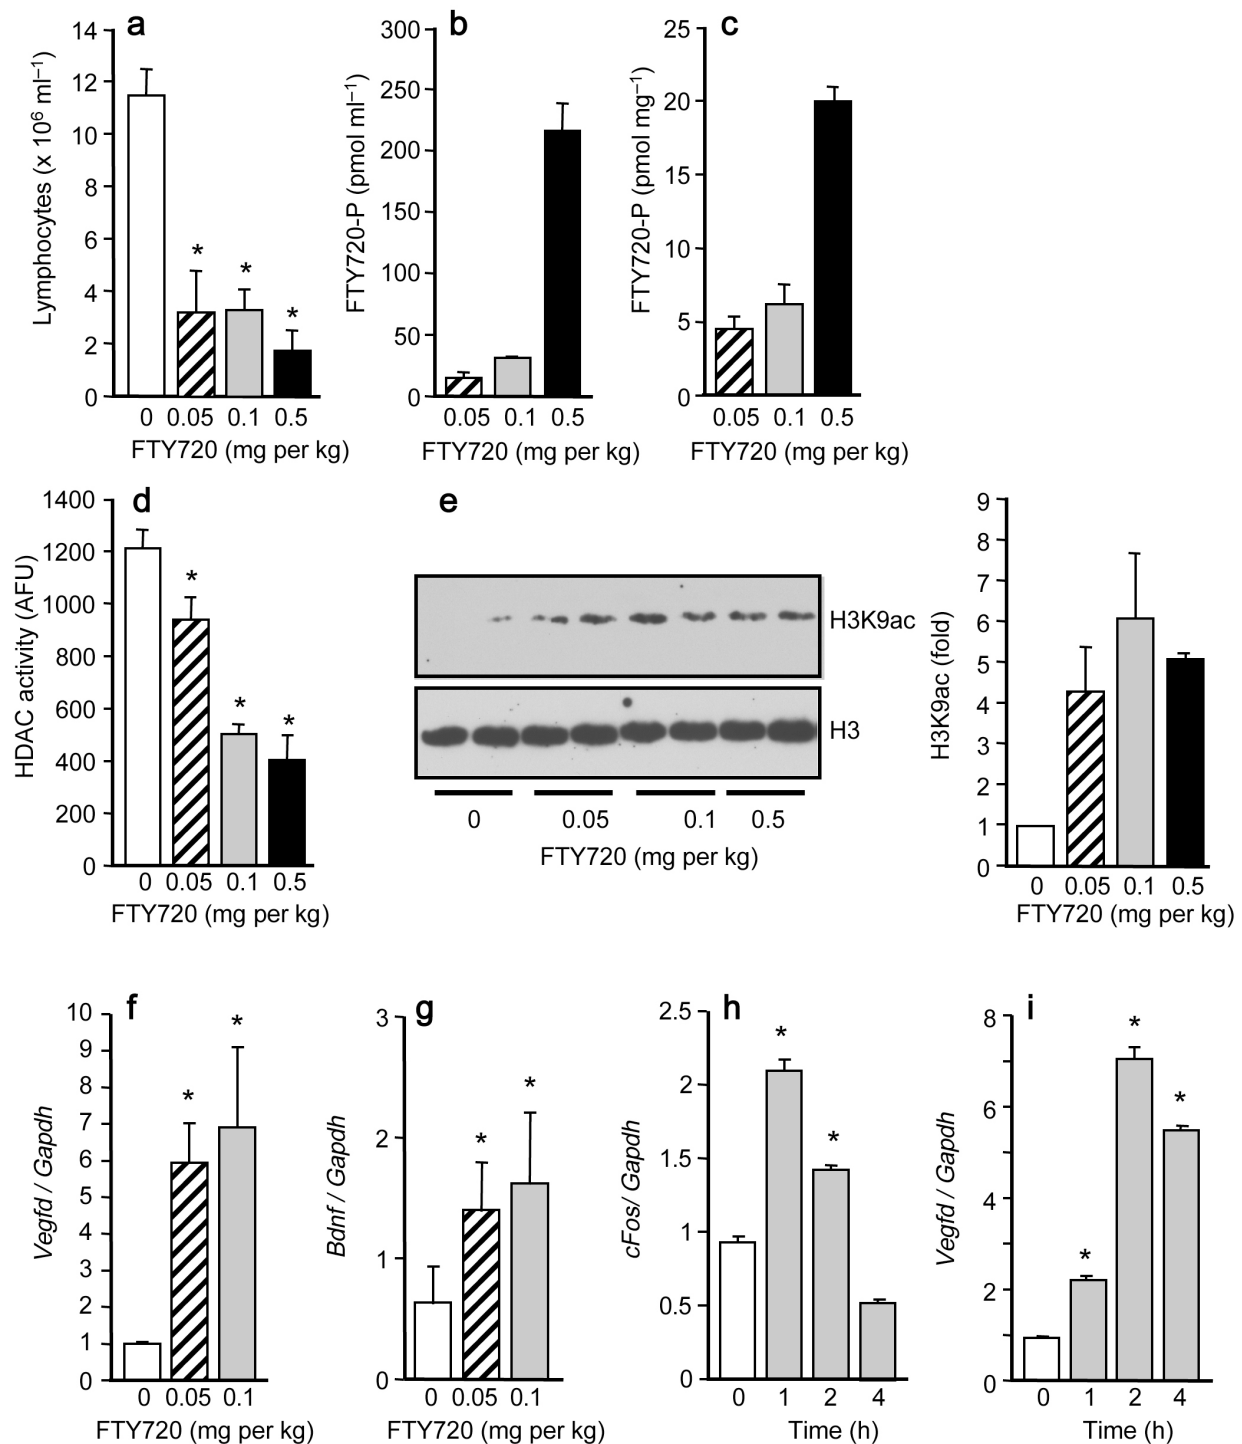

**Supplementary Figure 5. Formation of FTY720-P, inhibition of HDACs, and enhanced histone acetylation and gene expression in the hippocampus following oral administration of FTY720 to C57Bl/6 mice.** (a-e) FTY720 was administered by gavage to C57Bl/6 mice at the indicated doses. 24 h later, lymphocytes in blood were counted (a), FTY720-P levels in serum (b) and hippocampal nuclei (c) measured by LCESI-MS/MS, and hippocampus HDAC activity (d) and H3K9 acetylation (e) were determined. (f-i) QPCR analysis of *Vegfd*, *Bdnf*, and *cFos* expression after treatment of mice with different doses of FTY720 for 24 h (f,g) or with 0.1 mg/kg for the indicated times (h,i). \* $P < 0.01$ , compared to untreated (unpaired two-tailed t test).

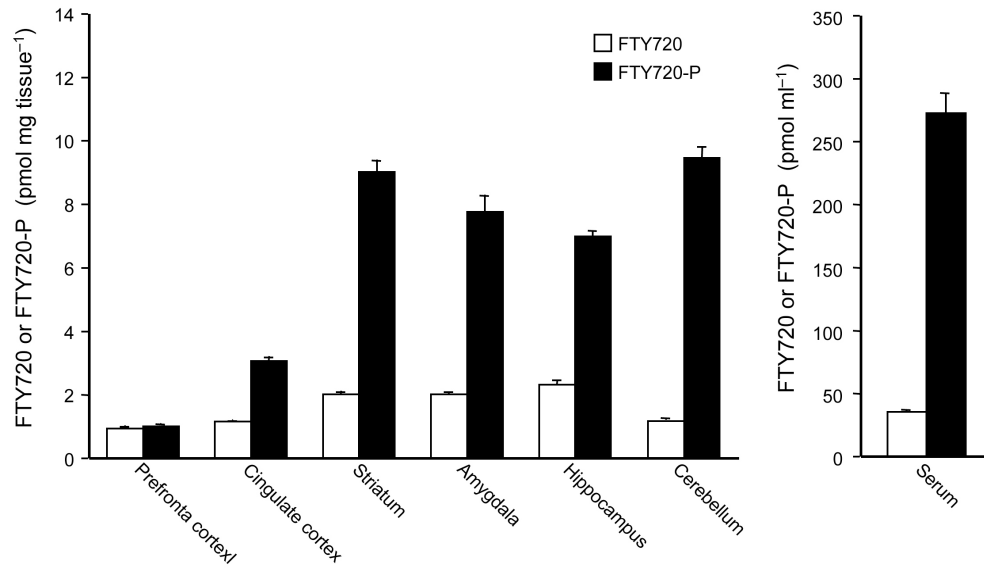

**Supplementary Figure 6. Accumulation of FTY720-P in various brain regions.** SCID mice were treated daily with FTY720 as described in Fig. 5d. Blood was collected and brain regions were isolated and levels of FTY720 and FTY720-P were measured by LC-ESI-MS/MS.

Note: Assuming brain is 75% water, the concentration of FTY720-P in hippocampus for example is ~9  $\mu\text{M}$  compared to 0.27  $\mu\text{M}$  in blood.

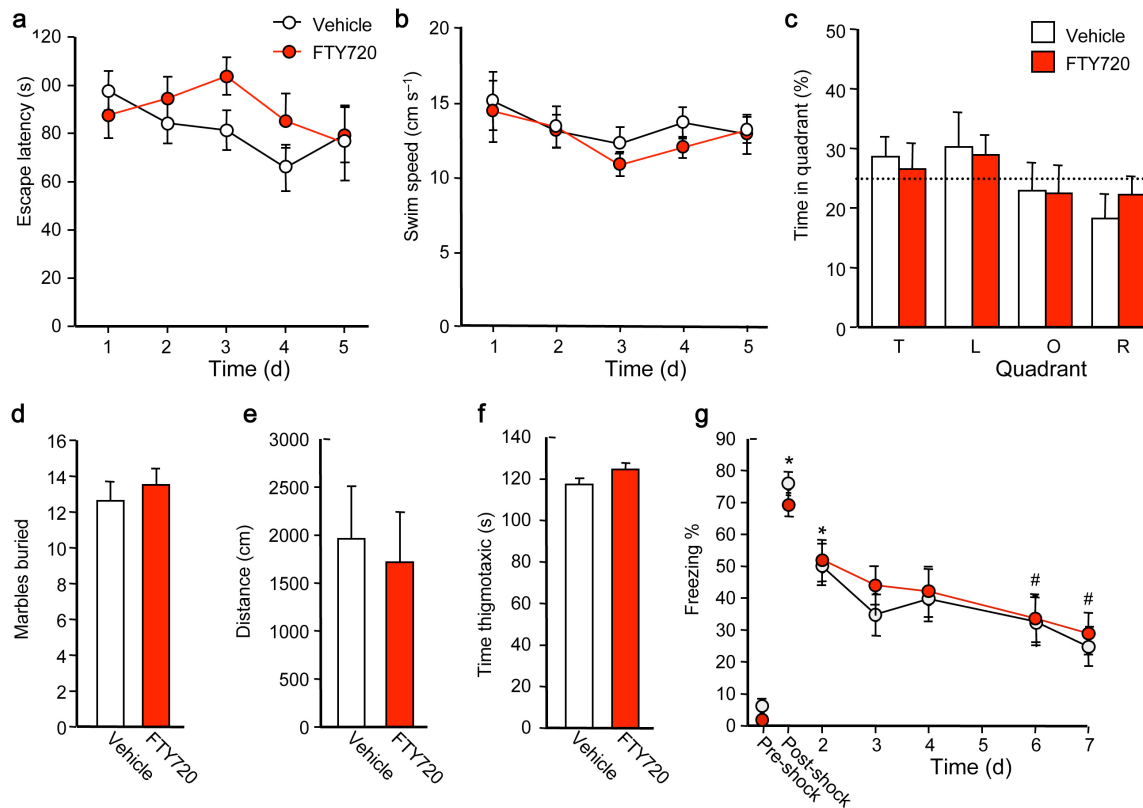

**Supplementary Figure 7. FTY720 does not affect performance of SCID mice in the Morris water maze, marble burying, exploratory activity and cued fear conditioning test.** SCID mice were treated orally each day by gavage with saline or FTY720 (1 mg/kg) starting 16 h prior to the (a-c) MWM paradigm, (d-f) behavioral testing, and (g) tone-shock paired conditioned fear testing. (a-c) FTY720 did not affect the performance of SCID mice in MWM. (a) Escape latencies (two-way repeated measures ANOVA; interaction:  $F(4,60) = 1.43$ ;  $P = 0.23$ ; day:  $F(4,60) = 1.96$ ;  $P = 0.11$ ; treatment:  $F(1,60) = 0.64$ ;  $P = 0.44$ ) and (b) swim speeds (two-way ANOVA; interaction:  $F(4,60) = 0.26$ ;  $P = 0.90$ ; day:  $F(4,60) = 1.68$ ;  $P = 0.17$ ; treatment:  $F(1,60) = 0.33$ ;  $P = 0.57$ ) of FTY720 and saline treated mice did not significantly differ on the five days of fixed platform training. (c) The percentage of time spent in the in each quadrant (T, target quadrant; L, left quadrant; O, opposite quadrant; R, right quadrant) during a 120 s probe trial. 24 h after the fifth day of training also did not differ in mice treated with FTY720 or saline (two-way repeated measures ANOVA; interaction:  $F(3,45) = 0.10$ ;  $P = 0.96$ ; quadrant:  $F(3,45) = 1.15$ ;  $P = 0.34$ ; treatment:  $F(1,45) = 0.93$ ;  $P = 0.35$ ). T, target quadrant; L, left quadrant; O, opposite quadrant; R, right quadrant. (d) In the marble burying test, SCID mice buried a similar number of marbles regardless of FTY720 treatment (t-test:  $t(1,18) = 0.63$ ;  $P = 0.54$ ). (e-f) FTY720 did not affect (e) distance traveled (t-test:  $t(1,18) = 0.32$ ;  $P = 0.75$ ) or (f) time thigmotaxic during a 3 min exposure to a novel environment (t-test:  $t(1,18) = 1.61$ ;  $P = 0.13$ ). (g) SCID mice treated with FTY720 or saline displayed similar freezing and extinction in a tone-shock paired conditioning paradigm. Data represent percent time freezing during the 3 min before tone-shock pairings (pre-shock), 60 s after tone-shock pairings (post-shock), and during 200 s tone on extinction days. \* $P < 0.001$ , vs. pre-shock (Bonferroni post hoc test). #  $P < 0.001$ , compared to day 2, the first day of extinction (Bonferroni post hoc test). Both treatment groups had similar levels of freezing pre-shock, post-shock, and on extinction day 1 (two-way ANOVA; interaction:  $F(2,36) = 0.51$ ;  $P = 0.61$ ; time:  $F(2,36) = 146.54$ ;  $P < 0.0001$ ; treatment:  $F(1,36) = 0.67$ ;  $P = 0.42$ ) and exhibited similar rates of extinction (two-way repeated measures ANOVA, interaction:  $F(4,72) = 0.28$ ;  $P = 0.89$ ; extinction session:  $F(4,72) = 8.33$ ;  $P < 0.0001$ ; treatment:  $F(1,72) = 0.23$ ;  $P = 0.64$ ). Tests in (d-g) were performed in the same cohort of mice.  $N = 7-10$  mice/group. Data are mean  $\pm$  s.e.m.



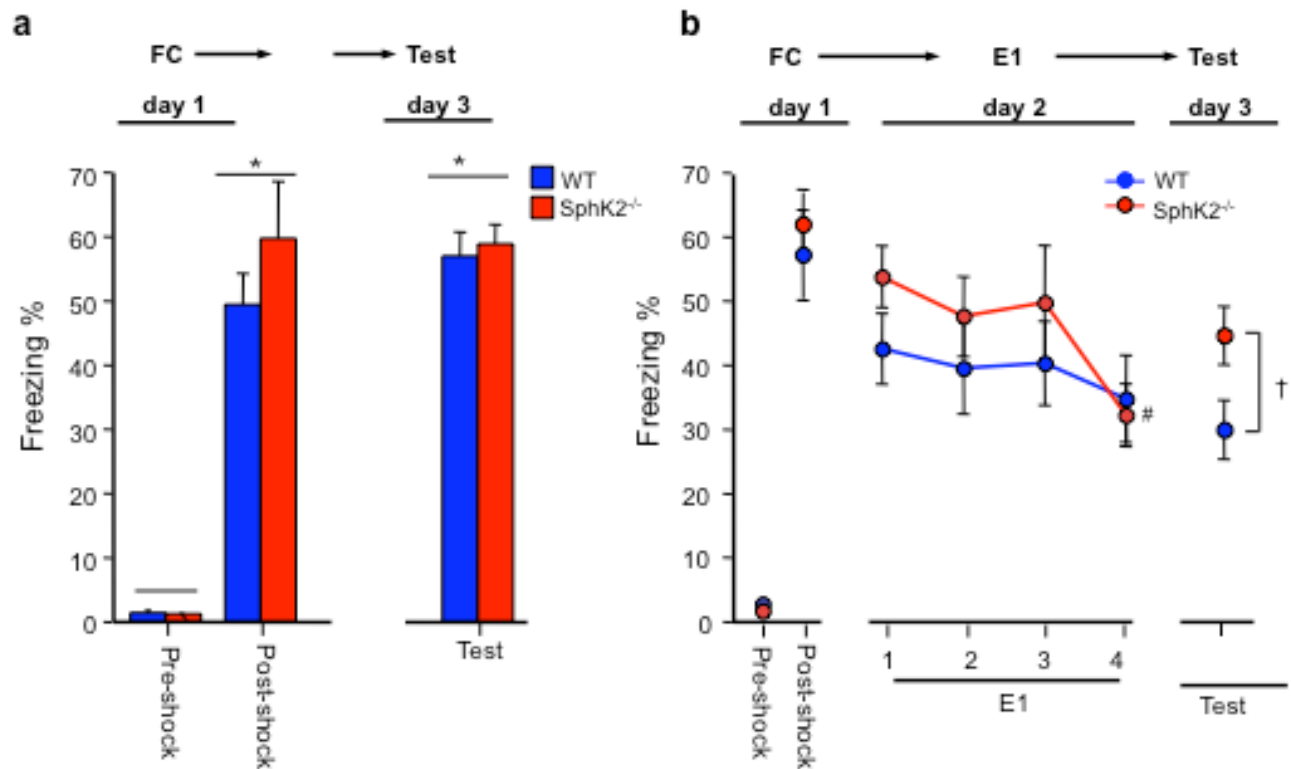

**Supplementary Figure 8. *Sphk2*<sup>-/-</sup> mice show decreased fear extinction in the contextual fear paradigm.** (a) *Sphk2*<sup>-/-</sup> and WT mice do not forget the association between the context and footshock 48 h after conditioning. Mice were subjected to three footshocks on the conditioning day and received a 2.5 min test 48 h later. *Sphk2*<sup>-/-</sup> and WT mice exhibited similar levels of freezing pre-shock, post-shock, and 48 h after conditioning (i.e., no extinction sessions) (two-way repeated-measures ANOVA; interaction:  $F(2,30) = 0.77$ ;  $P = 0.47$ ; time:  $F(2,30) = 100.95$ ;  $P < 0.0001$ ; genotype:  $F(1,30) = 0.87$ ;  $P = 0.37$ ). Percent time freezing in both genotypes was significantly increased post-shock and at 48 h compared to pre-shock ( $*P < 0.001$ , Bonferroni post hoc test).  $N = 8$  for WT;  $N = 9$  for *Sphk2*<sup>-/-</sup> mice. (b) *Sphk2*<sup>-/-</sup> mice display extinction learning deficits in the contextual fear paradigm. *Sphk2*<sup>-/-</sup> and WT mice were subjected to three footshocks on day 1 and received one extinction session (10 min) 24 h later (E1, consecutive 2.5 min bins are indicated by 1, 2, 3, 4). Mice were then evaluated on day 3 in a 2.5 min test. Both genotypes exhibited similar levels of freezing pre-shock, post-shock, and 24 h after conditioning (two-way repeated-measures ANOVA; interaction:  $F(2,32) = 1.44$ ;  $P = 0.26$ ; time:  $F(2,32) = 110$ ;  $P < 0.0001$ ; genotype:  $F(1,32) = 1.87$ ;  $P = 0.19$ ). Significant increases in freezing were found post-shock ( $P < 0.001$ ) and in the first 2.5 min bin of the extinction session (E1) ( $P < 0.001$ ) as compared with pre-shock levels of freezing (Bonferroni post hoc test). In the 10 min extinction session both genotypes exhibited similar freezing behavior (two-way repeated measures ANOVA; interaction:  $F(3,48) = 2.01$ ;  $p = 0.13$ ); extinction time:  $F(3,48) = 6.22$ ;  $P < 0.0012$ ; genotype:  $F(1,48) = 1.6$ ;  $P = 0.22$ ). #  $P < 0.01$  indicates a significant difference from the first bin of the extinction session for both genotypes (Bonferroni post hoc test), † $P < 0.05$  indicates a significant difference between WT and *Sphk2*<sup>-/-</sup> mice on test day 3 (Bonferroni post hoc test).  $N = 9$  per group. Data are presented as mean  $\pm$  s.e.m.

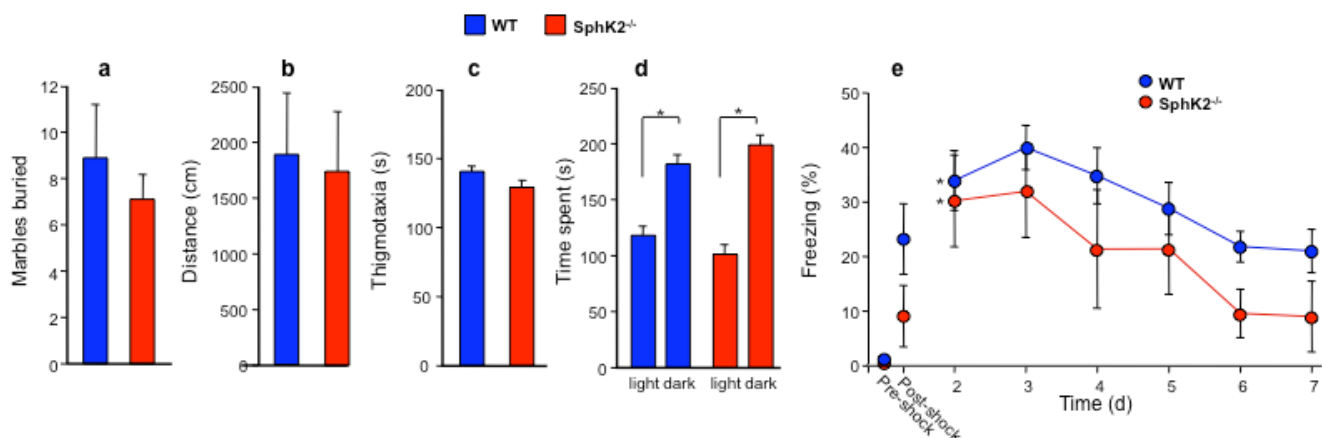

**Supplementary Figure 9. Anxiety-like behavior, exploratory activity, and performance in the cued fear conditioned tests were similar in WT and *Sphk2*<sup>-/-</sup> mice.** (a-c) WT and SphK2<sup>-/-</sup> mice show similar responses in the marble-burying test and for exploratory behavior in a novel environment. (a) No genotype differences were found for the number of marbles buried (unpaired t-test:  $t(1,17) = 0.73$ ;  $P = 0.48$ ), as well as (b) for the distance traveled (unpaired t-test:  $t(1,17) = 0.19$ ;  $P = 0.86$ ) and (c) time spent thigmotaxia in a novel environment (unpaired t-test:  $t(1,17) = 1.73$ ;  $P = 0.10$ ). (d) WT and SphK2<sup>-/-</sup> mice were evaluated in the Light/Dark Box test to assess anxiety-like behavior. Both genotypes spent significantly more time in the dark compartment than the light compartment (paired Student's t test: WT:  $t(1,8) = 3.91$ ;  $P < 0.01$ ; SphK2<sup>-/-</sup>:  $t(1,8) = 5.69$ ;  $P < 0.01$ ), but did not differ between each other in the dark (unpaired t-test:  $t(1,16) = 1.43$ ;  $P = 0.17$ ) or light (unpaired Student's t test:  $t(1,16) = 1.43$ ;  $P = 0.17$ ) compartments. (e) **WT and SphK2<sup>-/-</sup> mice displayed similar freezing behavior and extinction in tone-paired conditioning paradigm.** WT and SphK2<sup>-/-</sup> mice had similar levels of freezing during the 3 min prior to tone-shock pairing (pre-shock), 60 s after tone-shock pairing (post-shock), and during 200 s tone presentation without shock 24 h after conditioning (day 2) (two-way repeated measures ANOVA; interaction:  $F(2,34) = 2.03$ ;  $P = 0.15$ ; time:  $F(2,34) = 15.8$ ;  $P < 0.0001$ ; genotype:  $F(1,34) = 3.0$ ;  $P = 0.10$ ). \* $P < 0.001$ , vs. pre-shock (Bonferroni post hoc test). Both genotypes exhibited similar decreases in freezing across the six days of extinction training (two-way ANOVA; interaction:  $F(5,85) = 0.52$ ;  $P = 0.76$ ; genotype:  $F(1,85) = 1.52$ ;  $P = 0.23$ ; test day:  $F(5,85) = 13.8$ ;  $P < 0.0001$ ).  $P < 0.001$  for days 6 and 7 as compared to day 2 (Bonferroni post hoc test). Tests in (a-d) were performed in the same cohort of mice.  $N = 9-10$  mice/group. Data are expressed as mean  $\pm$  s.e.m.

**Supplementary Figure 10.** Full-length images of the blots presented in the main figures.

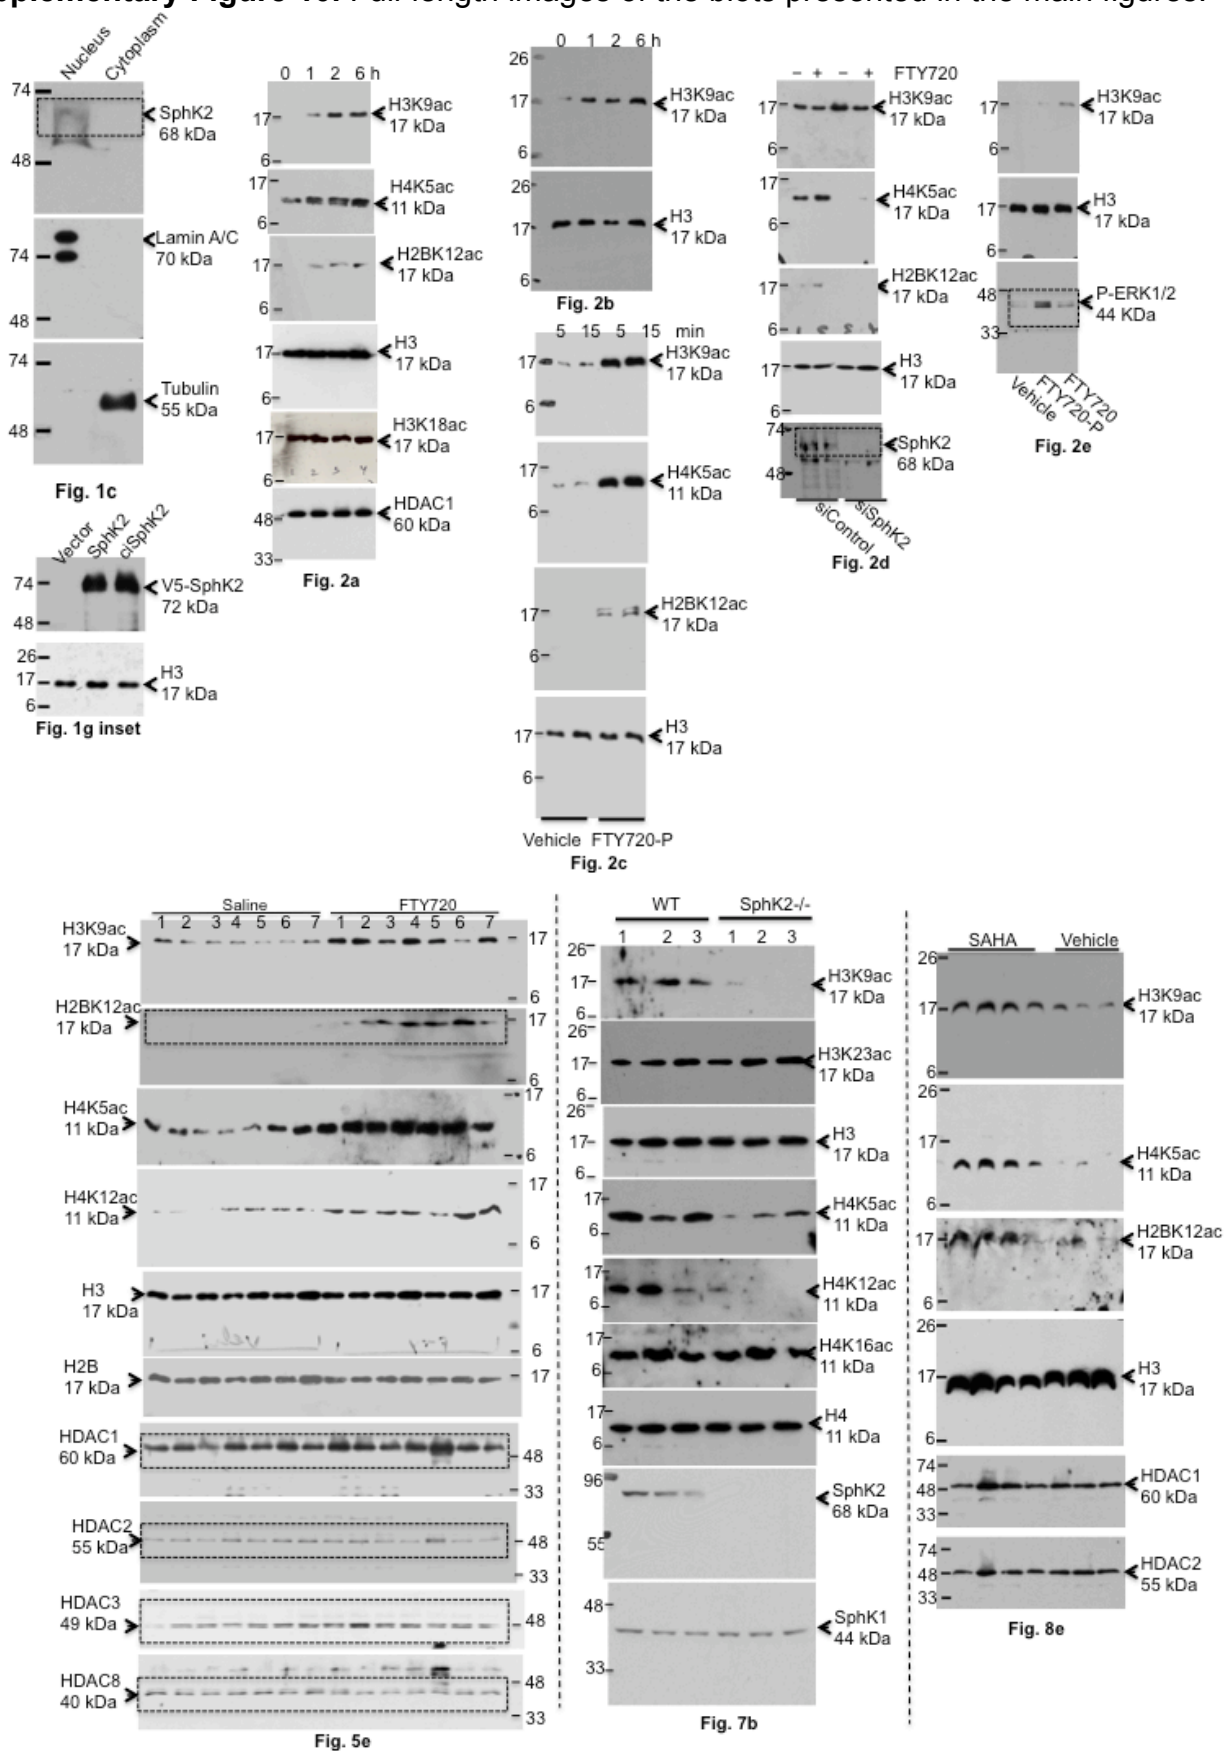

**Supplementary Table 1 Bioinformatics analysis of memory related genes that were differentially regulated by FTY720 during fear extinction (FDR < 5%).**

| Functions Annotation | p-Value  | Regulation z-score | # Molecules | Molecules                                                                                                                                                                                                                                                                                                                                                                               |
|----------------------|----------|--------------------|-------------|-----------------------------------------------------------------------------------------------------------------------------------------------------------------------------------------------------------------------------------------------------------------------------------------------------------------------------------------------------------------------------------------|
| behavior             | 3.22E-10 | -1.163             | 66          | ADCY6,ADORA2A,ATF2,ATG7,B2M,CADPS2,CARTPT,CHRD,CNR1,CRY1,DDC,DNAJC5,DRD2,EGR1,EGR2,FA2H,FEZF2,FOS,FIGF,GABRD,GPD2,GRIA1,GRP,HCN1,HSPA1A/HSPA1B,HTR1A,IDO1,ILF3,KHDRBS1,KIT,LHX8,LPAR1,MAP2,MUT,NCOA1,NETO1,NEUROD1,NOV,NPTX2,NPY,NPY2R,NR4A2,NXPH3,PCP4,PDE1B,PDYN,PENK,PPP1R1B,PRKCG,PTN,RARB,RGS9,SEMA3A,SEZ6,SLC11A2,SLC17A6,SLC1A2,SLC26A4,SNCA,SNRPN,SST,TAC1,TACR3,TRPC5,VIP,ZIC1 |
| cognition            | 5.48E-08 | -0.778             | 29          | ADORA2A,CHRD,DRD2,EGR1,FA2H,GABRD,HCN1,HTR1A,KIT,LHX8,NCOA1,NETO1,NPTX2,NPY2R,NR4A2,NXPH3,PCP4,PDE1B,PLP1,PPP1R1B,PRKCG,PTN,RARB,SEZ6,SLC11A2,SNCA,SST,TAC1,TACR3                                                                                                                                                                                                                       |
| learning             | 6.12E-08 | -0.515             | 27          | CHRD,DRD2,EGR1,FA2H,GABRD,HCN1,HTR1A,KIT,LHX8,NCOA1,NETO1,NPTX2,NPY2R,NR4A2,NXPH3,PCP4,PDE1B,PPP1R1B,PRKCG,PTN,RARB,SEZ6,SLC11A2,SNCA,SST,TAC1,TACR3                                                                                                                                                                                                                                    |
| emotional behavior   | 1.10E-05 | -0.253             | 20          | ADORA2A,B2M,CADPS2,CARTPT,CNR1,DRD2,GABRD,GRIA1,HSPA1A/HSPA1B,HTR1A,KHDRBS1,MAP2,NPY,NPY2R,NR4A2,PDYN,PENK,SLC17A6,TACR3,TRPC5                                                                                                                                                                                                                                                          |
| conditioning         | 1.96E-05 | -1.31              | 17          | ADORA2A,CARTPT,CNR1,DRD2,FEZF2,GABRD,GMFB,GRIA1,HCN1,MAP2,NPY,PDYN,PENK,PPP1R1B,PRKCG,SLC17A6,TIMP2 (includes EG:21858)                                                                                                                                                                                                                                                                 |
| addiction behavior   | 5.16E-05 | -0.842             | 6           | ADORA2A,CNR1,DRD2,NR4A2,PENK,PPP1R1B                                                                                                                                                                                                                                                                                                                                                    |
| anxiety              | 5.86E-05 | 0.106              | 17          | ADORA2A,CADPS2,CARTPT,CNR1,DRD2,FKBP5,GABRD,GRIA1,HTR1A,NPY,NPY2R,PDYN,PENK,PRKCG,RASD2,TAC1,TRPC5                                                                                                                                                                                                                                                                                      |
| spatial learning     | 1.69E-04 |                    | 15          | DRD2,FA2H,HCN1,HTR1A,KIT,NCOA1,NETO1,NPY2R,NXPH3,PDE1B,PPP1R1B,PRKCG,RARB,SEZ6,TACR3                                                                                                                                                                                                                                                                                                    |
| motor learning       | 2.50E-04 |                    | 5           | FA2H,HCN1,PCP4,PRKCG,SST                                                                                                                                                                                                                                                                                                                                                                |
| exploratory behavior | 2.92E-04 | 0.133              | 7           | ADORA2A,CADPS2,CHRD,CNR1,DRD2,GRIA1,PDE1B                                                                                                                                                                                                                                                                                                                                               |
| feeding              | 3.72E-04 | -1.174             | 21          | CARTPT,CNR1,DRD2,EGR2,FEZF2,FOS,FIGF,GPD2,GRP,HTR1A,ILF3,LPAR1,MUT,NPY,NPY2R,NR4A2,PDYN,SEMA3A,SNRPN,TACR3,ZIC1                                                                                                                                                                                                                                                                         |
| place preference     | 4.81E-04 | -0.903             | 6           | CARTPT,CNR1,DRD2,GRIA1,PDYN,PPP1R1B                                                                                                                                                                                                                                                                                                                                                     |
| aversive behavior    | 2.04E-03 |                    | 5           | CARTPT,DRD2,NPY,PDYN,SLC17A6                                                                                                                                                                                                                                                                                                                                                            |
| locomotion           | 2.25E-03 | -0.142             | 19          | ADORA2A,ATG7,CARTPT,CNP,CNR1,DRD2,FEZF2,GRP37,GRIA1,HSPA1A/HSPA1B,MYO6,NPY2R,NR4A2,PDE1B,PPP1R1B,RARB,RASD2,RELN,SNCA                                                                                                                                                                                                                                                                   |
| long-term memory     | 3.59E-03 |                    | 6           | DRD2,EGR1,GRIA1,GRP,NPY2R,TAC1                                                                                                                                                                                                                                                                                                                                                          |
| fear                 | 7.02E-03 | 1.681              | 6           | HTR1A,MAP2,NPY,NPY2R,PENK,TRPC5                                                                                                                                                                                                                                                                                                                                                         |
| memory               | 7.38E-03 | -0.771             | 13          | ADORA2A,CADPS2,CNR1,DRD2,EGR1,GABRD,GRIA1,GRP,HTR1A,NETO1,NPY,NPY2R,TAC1                                                                                                                                                                                                                                                                                                                |
